# Supplementary material for: Metal ion driven formation of a light-harvesting antenna investigated by sensitized luminescence and fluorescence anisotropy
Source: Royal Society of Chemistry journal article supplement (doi:10.1039/c001235a), 2010-01-01
Supplement: c001235a.pdf [file c001235a.pdf]

## SUPPORTING INFORMATION

### Metal ion driven formation of a light-harvesting antenna investigated by sensitized luminescence and fluorescence anisotropy

Barbara Branchi, Giacomo Bergamini, Luca Fiandro, Paola Ceroni,\* Fritz Vögtle, Frank-Gerrit Klärner

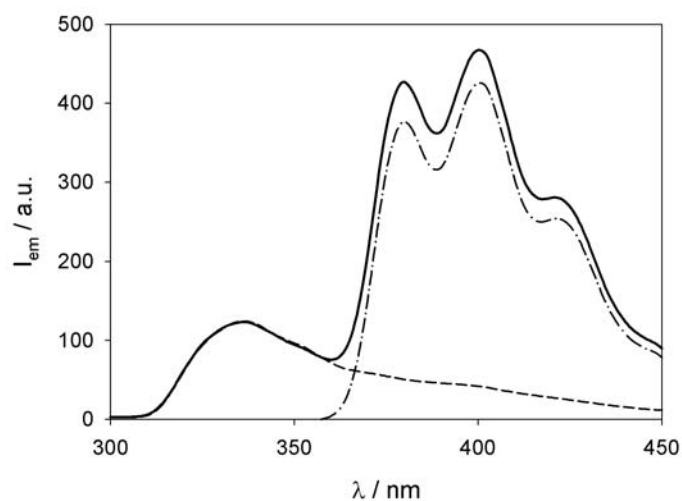

**Figure S1.** Emission spectra of **D** (dashed line), **C**<sup>2-</sup> (dashed-dotted line), and an equimolar solution of the two species (solid line) in the presence of 80 equivalents of Zn(CF<sub>3</sub>SO<sub>3</sub>)<sub>2</sub> in CH<sub>3</sub>CN/CH<sub>2</sub>Cl<sub>2</sub> 1:1 (v/v) solution at 298 K.  $\lambda_{\text{ex}} = 288$  nm. Concentration of **D** and **C**<sup>2-</sup>:  $5.2 \times 10^{-6}$  M.

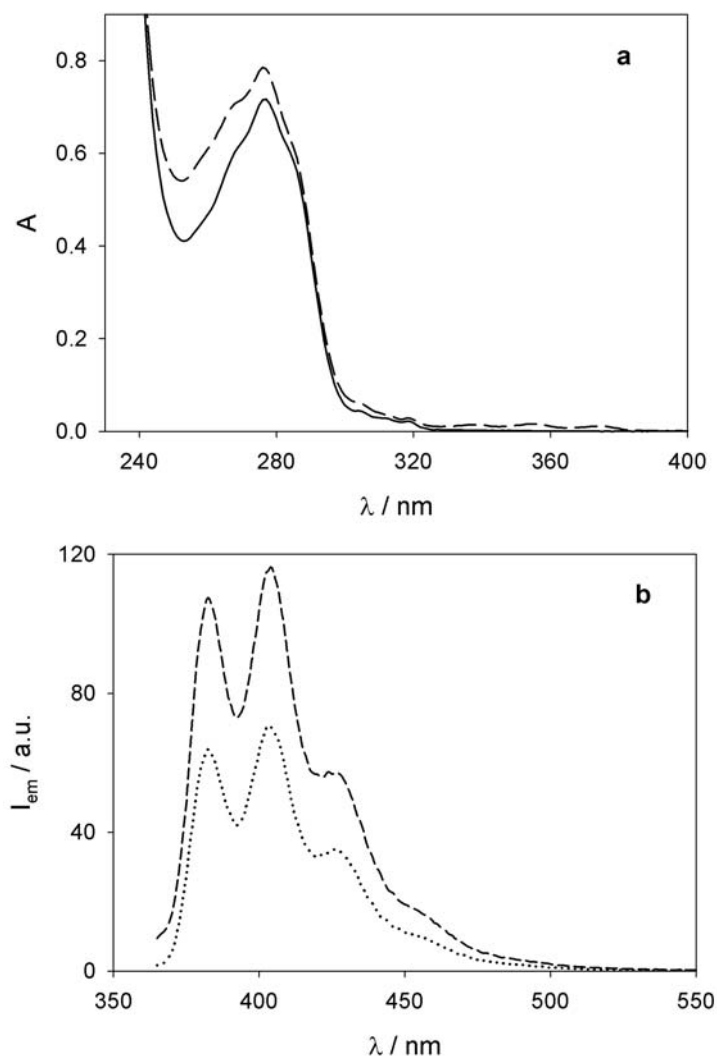

**Figure S2.** (a) Absorption spectra of a  $6.4 \times 10^{-6}$  M solution of **D** in the presence of 1.1 eq. of  $\text{Zn}(\text{CF}_3\text{SO}_3)_2$  before (solid line) and after (dashed line) addition of 0.2 eq. of  $\text{C}^{2-}$ . (b) Emission spectra of a  $6.4 \times 10^{-6}$  M solution of **D** in the presence of 1.1 eq. of  $\text{Zn}(\text{CF}_3\text{SO}_3)_2$  with 0.2 eq. of  $\text{C}^{2-}$  upon excitation at 304 (dashed line) and 355 nm (dotted line). Solvent:  $\text{CH}_3\text{CN}/\text{CH}_2\text{Cl}_2$  1:1 (v/v) mixture;  $T = 298$  K.

The sensitization efficiency has been evaluated from the absorption and emission spectra reported in Figure S2 taking into consideration the following equation:

$$\eta = (I_{\text{obs}} - I_{0\%}) / (I_{100\%} - I_{0\%})$$

where  $I_{\text{obs}}$  is the experimental emission intensity upon excitation at 304 nm,  $I_{0\%}$  is the emission intensity expected in the case of no sensitization (emission is only due to the light directly absorbed by the clip at 304 nm),  $I_{100\%}$  is the emission intensity expected in the case of unitary efficient sensitization (the light absorbed by both the clip and the dendrimer of the **[DZnC]** complex brings about the clip emission).  $I_{0\%}$  and  $I_{100\%}$  are calculated on the basis of the emission observed upon excitation at 355 nm (where only the clip absorbs light).
